# Supplementary material
Source: PubMed Central journal article supplement (PMC3117022)
Supplement: NIHMS280996-supplement-1.pdf [file NIHMS280996-supplement-1.pdf]

**a**

**FoxA1 gene expression in normal tissues (GEO database):**

Mostly expressed in Prostate, Breast, Liver, Colon, Lung, Bladder, Stomach, Trachea

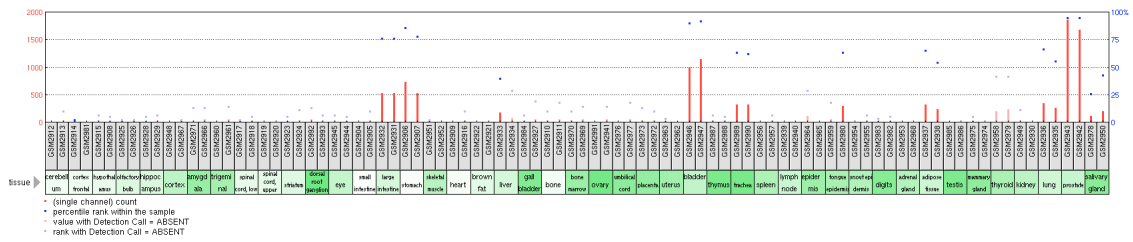

**b**

**FoxA1 gene expression in cancer cell lines (Gene Expression Atlas database):**

Highly expressed in Prostatic LNCaP, Breast MCF7, and Liver, Colon, & Lung Cancer cell lines

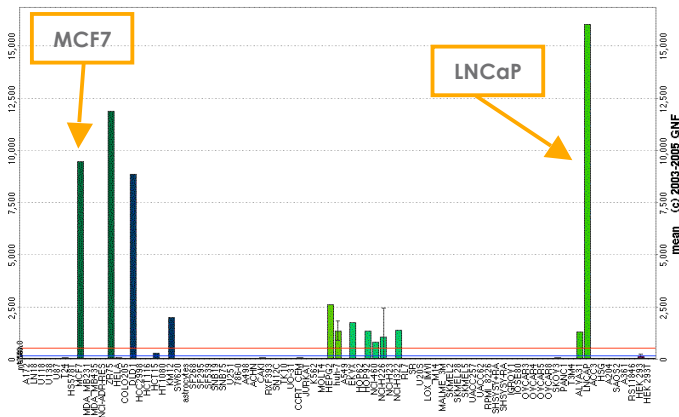

**Supplementary Figure 1. Lineage-specific expression of FoxA1 in normal prostatic tissue and prostate cancer cells. (a) FOXA1 tissue expression profile was extracted from the GEO database. (b) FOXA1 cancer cell line expression profile was obtained from the Gene Expression Atlas database.**

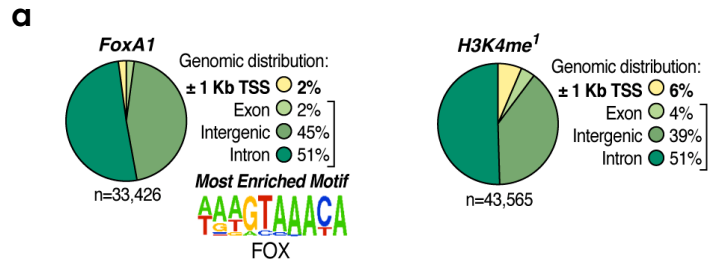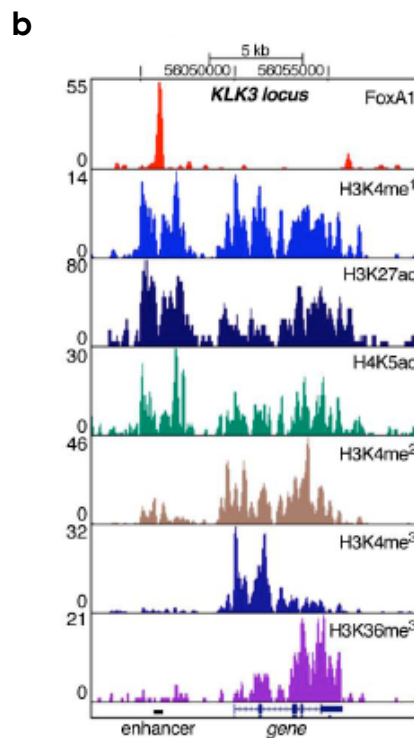

**Supplementary Figure 2. FoxA1 binding and histone marks on the *KLK3* locus. (a)** Genomic distribution of FoxA1 (n=33,426; left) and H3K4me1-positive, H3K4me3-negative (n=43,565; right) loci with respect to annotated genes. The most enriched motif on FoxA1 loci is the FOX binding site. **(b)** Shown are the distribution of FoxA1, H3K4me1, H3K27ac, H4K5ac, H3K4me2, H3K4me3, and H3K36me3 in DHT-treated LNCaP cells around the well-characterized androgen regulated *KLK3* gene. The y axis displays the number of normalized ChIP-seq tags. The position of the gene and the location of a reported upstream enhancer site are indicated at bottom.

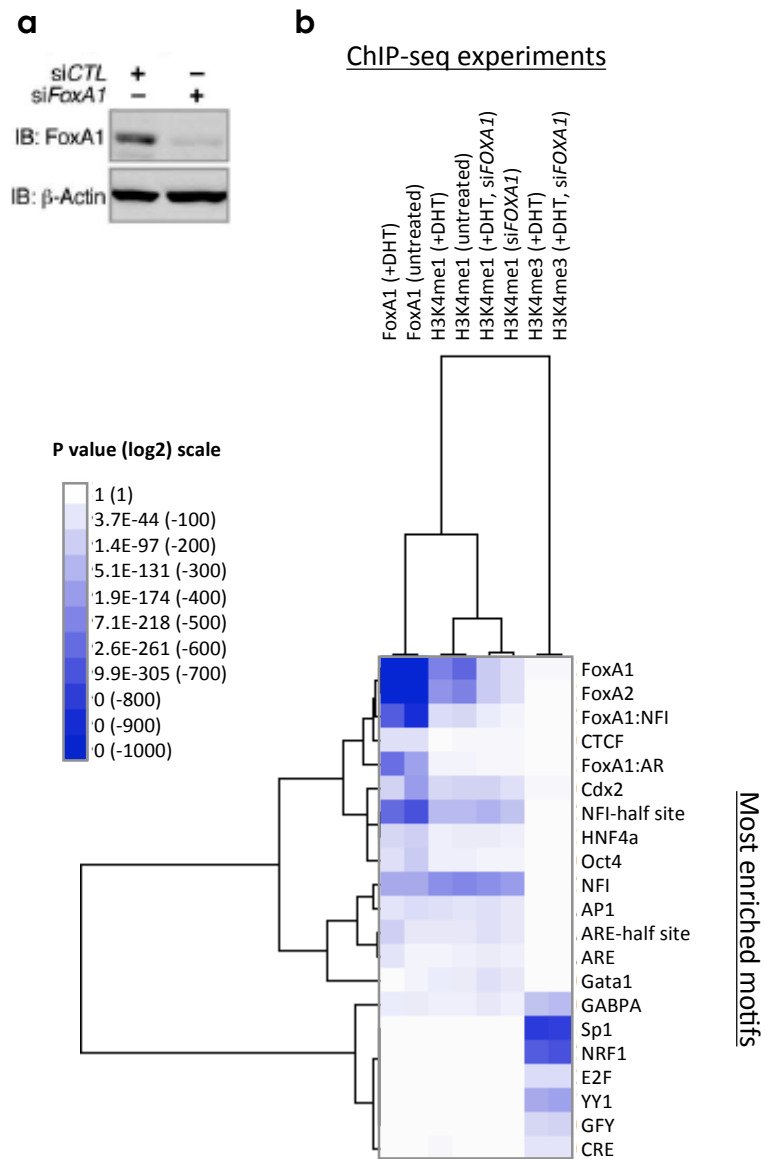

**Supplementary Figure 3. FoxA1 is a major component on H3K4me1-marked regions in LNCaP cells.** (a) Efficacy of *FOXAI* knockdown by siRNA. (b) Hierarchical clustering of motif enrichment in regions obtained by ChIP-seq of H3K4me1, H3K4me3, and FoxA1 demonstrates co-enrichment of the same FOX motif in H3K4me1 and FoxA1 loci. Enrichment of this same motif was selectively lost upon *FOXAI* siRNA treatment. Only motifs with a hypergeometric enrichment of at least  $10^{-50}$  in at least one experiment were included.

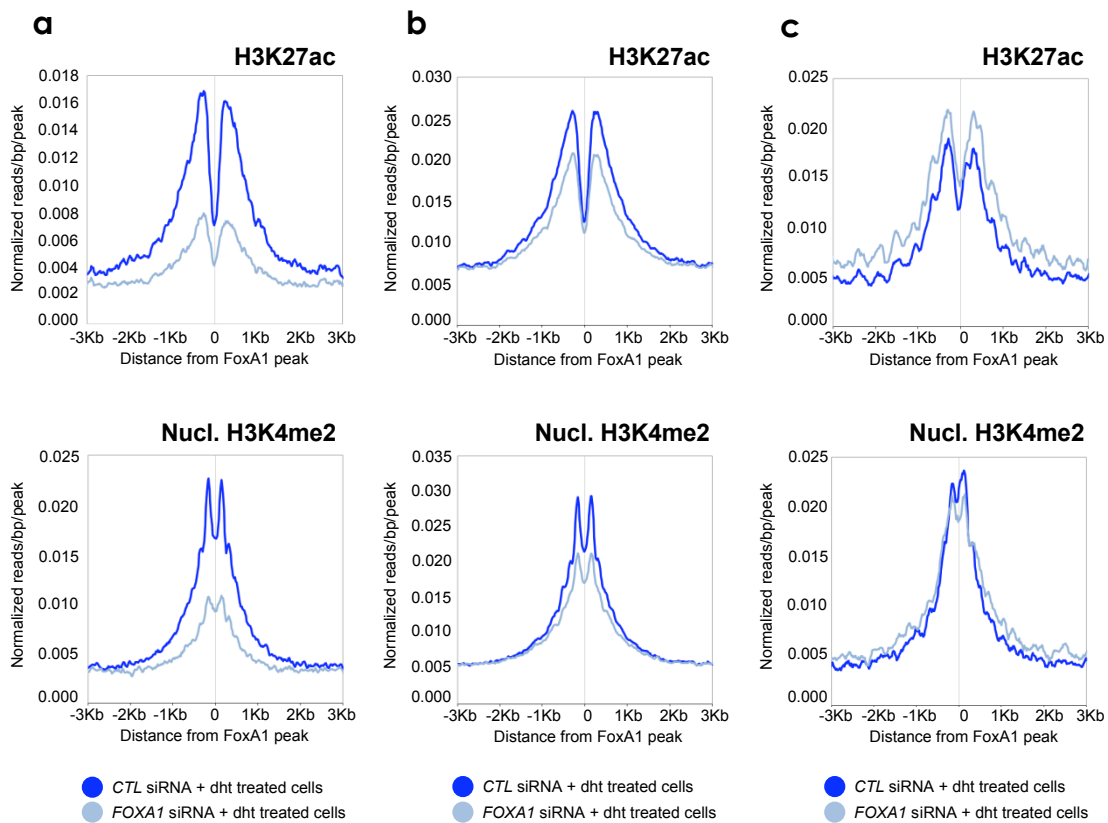

**Supplementary Figure 4. Effect of FOXA1 knockdown on H3K27ac and H3K4me2.**

Corresponding changes in H3K27ac (*top*) and H3K4me2 (*bottom*) marks around FoxA1-bound loci classified based on differential responses (a: decreased, b: no significant change, c: increase) of H3K4me1 to FOXA1 knockdown (see Fig.1g-i). Profiles shown for H3K4me2 are at the nucleosomal resolution.

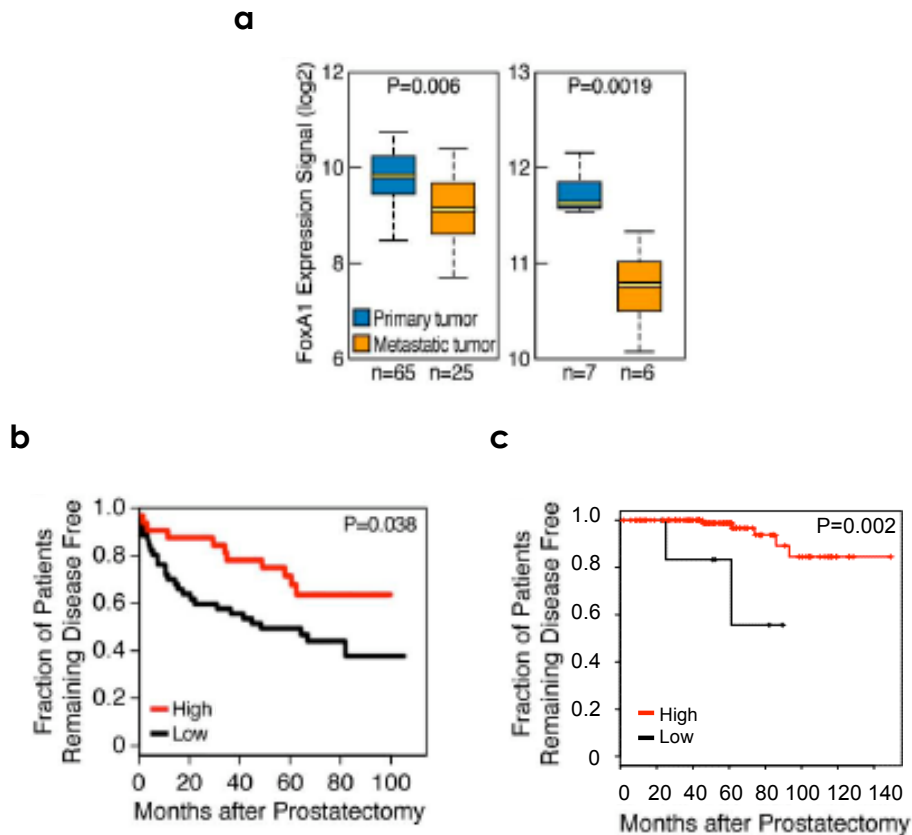

**Supplementary Figure 5. FoxA1 downregulation is significantly associated with metastatic prostate cancer and poor prognosis.** (a) *FOXA1* levels in primary and metastatic prostate tumors based on published gene expression profiling studies (left: GDS2545, ref. 36,37; right: GDS1439, ref. 38). (b) Kaplan-Meier plot of overall survival rates on a cohort of prostate cancer patients after prostatectomy (ref. 39). Patients are divided into two groups based on relative low (n=47; black) or high (n=31; red) *FOXA1* mRNA expression at the time of prostatectomy. *P*-value for the difference is indicated. (c) Kaplan-Meier plot of overall survival rates on another cohort of prostate cancer patients after prostatectomy (ref. 40). Patients were divided into two groups of based on relative low (n=7; black) or high (n=124; red) *FOXA1* mRNA expression at the time of prostatectomy. *P*-value for the difference is indicated.

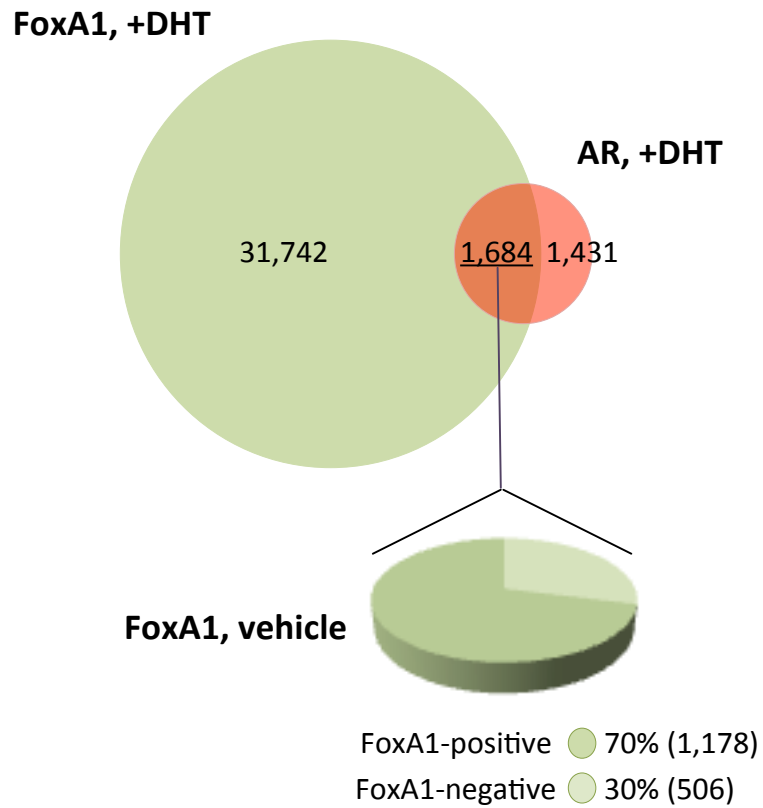

**Supplementary Figure 6. Co-incidence of DHT-induced AR genomic loci with FoxA1 binding in LNCaP cells.** Venn diagram of FoxA1 (n=33,426) and AR (n=3,115) bound loci detected by ChIP-seq in DHT-treated LNCaP cells at FDR<0.001. Among the overlapping sites, 70% is bound by FoxA1 before DHT treatment as indicated by the figure at the lower portion.

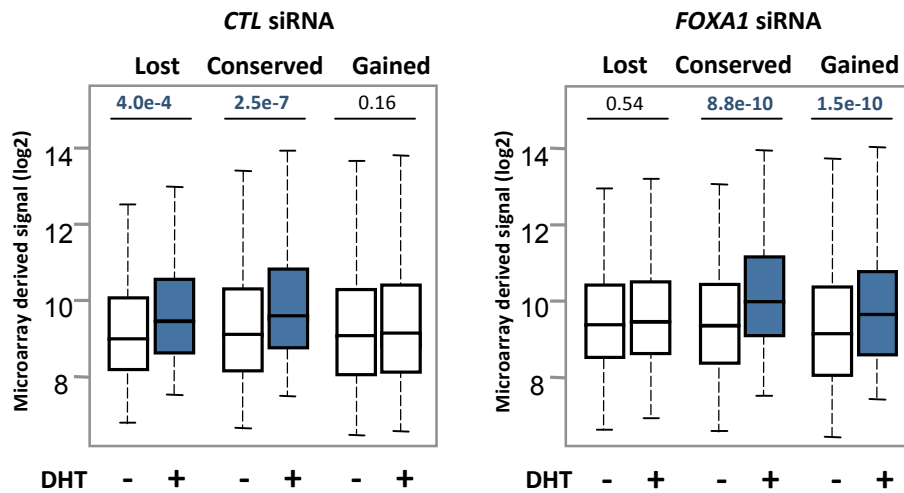

**Supplementary Figure 7. Different effects of *FOXA1* knockdown on individual DHT-induced gene expression programs.** The microarray expression data of up-regulated genes are compared in the lost, conserved, and gained programs before (-) and after (+) of DHT treatment in LNCaP cells that have been either mock-treated with control siRNA (left) or with *FOXA1* siRNA (right). Up-regulated groups are highlighted in filled boxed. Outliers were omitted from box plots. *P*-values are shown to highlight the significance in each case.

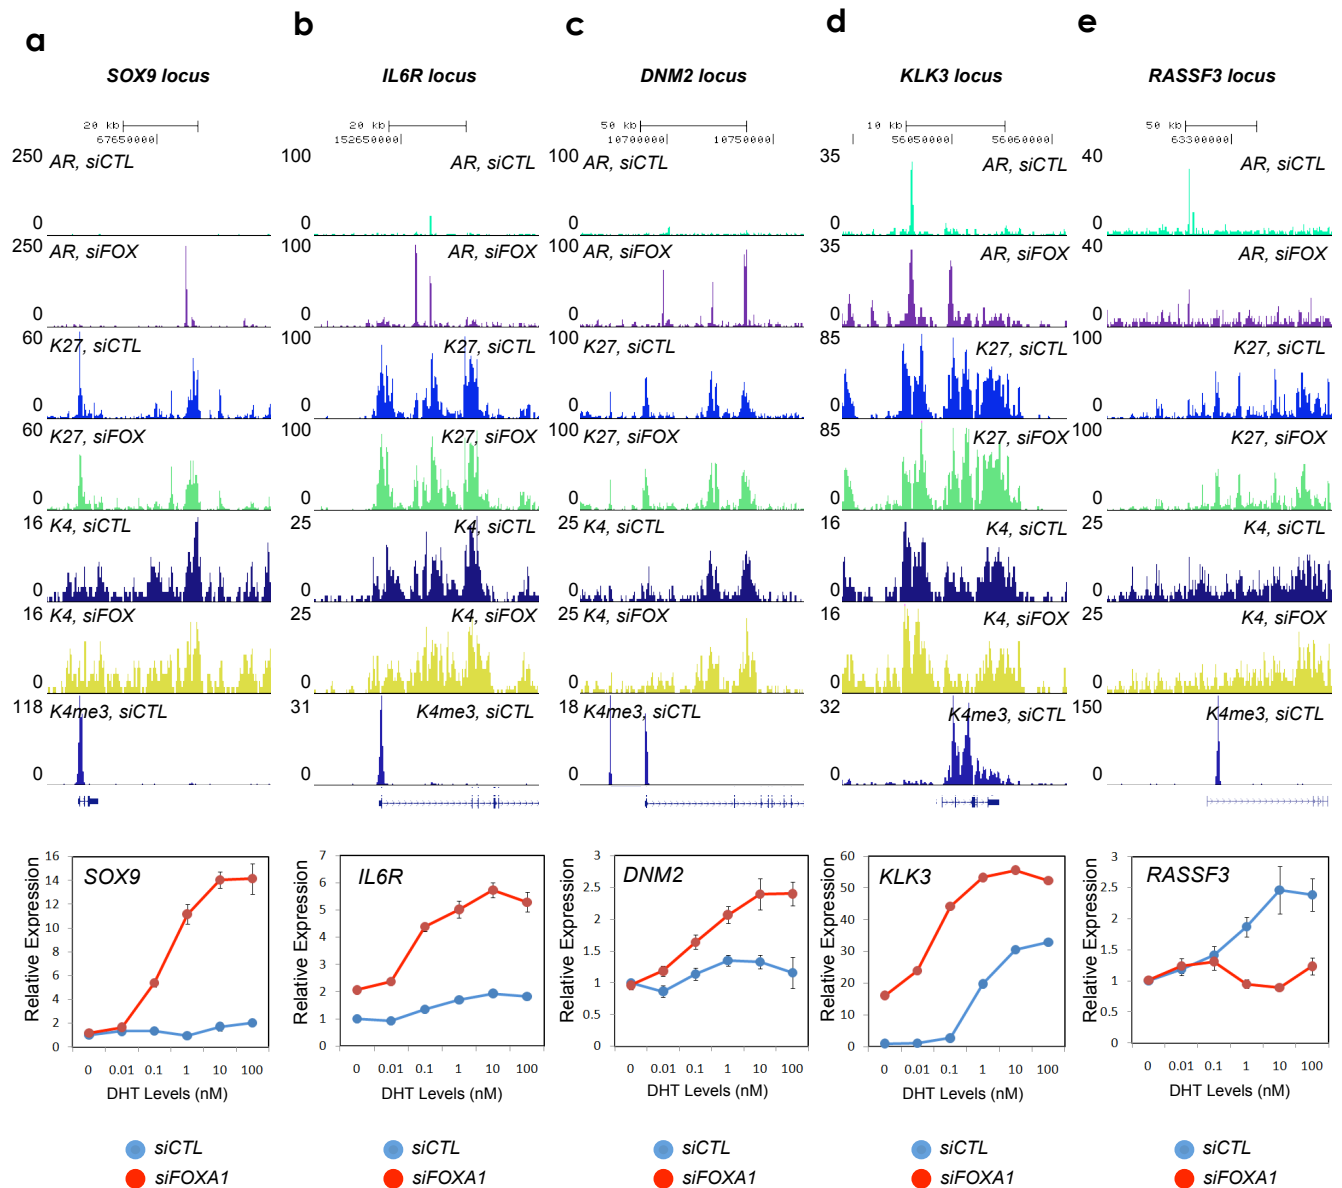

**Supplementary Figure 8. Illustrative examples of AR reprogrammed genes. (a-c)** Top panels: Examples of gained AR binding sites located within pre-existing epigenetic-marked, non-promoter regions. Shown are ChIP-seq profiles of AR, H3K27ac (K27), and H3K4me1 (K4) in control siRNA or *FOXA1* siRNA treated cells, and profile of H3K4me3 (K4me3) in control siRNA treated cells. Bottom panels: Responsiveness to increasing amounts of DHT in control siRNA or *FOXA1* siRNA treated cells, determined by RT-qPCR. **(d)** As example of AR binding (top) and gene expression (bottom) from the conserved program. **(e)** An example of AR binding site (top) and gene expression (bottom) in the lost program. Mean  $\pm$  s.e.m. is based on three independent experiments.



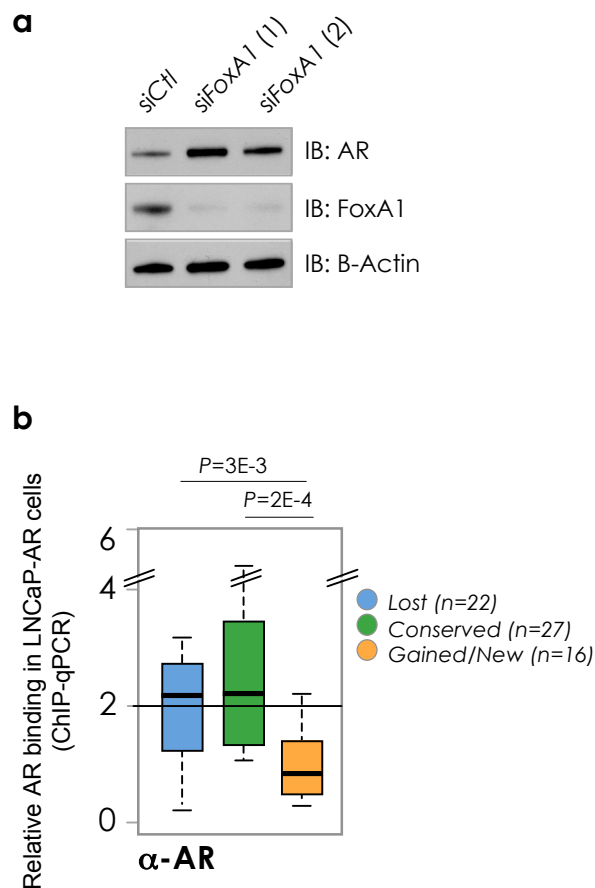

**Supplementary Figure 9. Effect of AR overexpression on AR genomic binding.** (a) Effect of *FOXA1* knockdown on AR protein. Two different *FOXA1* siRNAs tested (#1 and #2) induced AR. (b) Summary of ChIP-qPCR validated AR binding events on randomly selected genes from the lost (n=22), conserved (n=27), and gained (n=16) programs in LNCaP-AR cells, which is derived from LNCaP cells stably over-expressing AR. These genomic loci were the same tested for Fig. 2e. *P*-values show the significant differences detected.

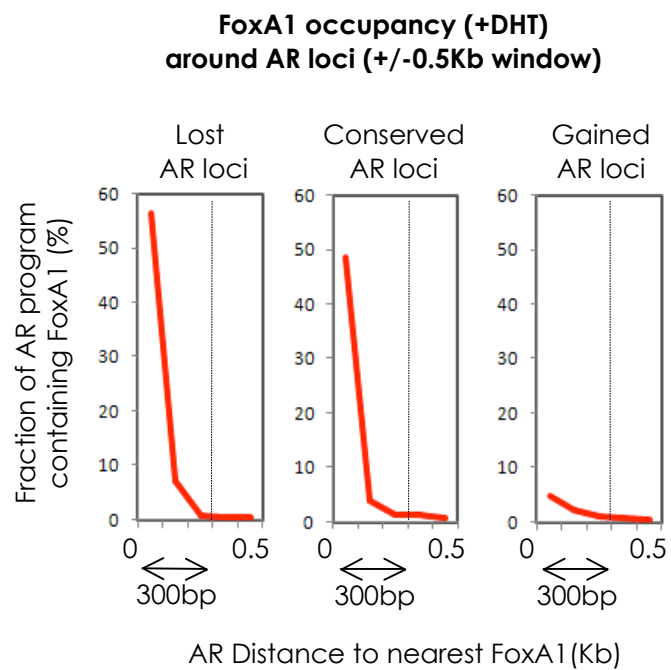

**Supplementary Figure 10. Relative FoxA1 occupancy levels in the lost, conserved, and gained AR binding programs.** The data show that FoxA1 binding is highly enriched in the vicinity (300bp) of AR binding sites in both the lost (62%) and conserved (52%) AR binding programs, but not in the gained AR binding program (7%).

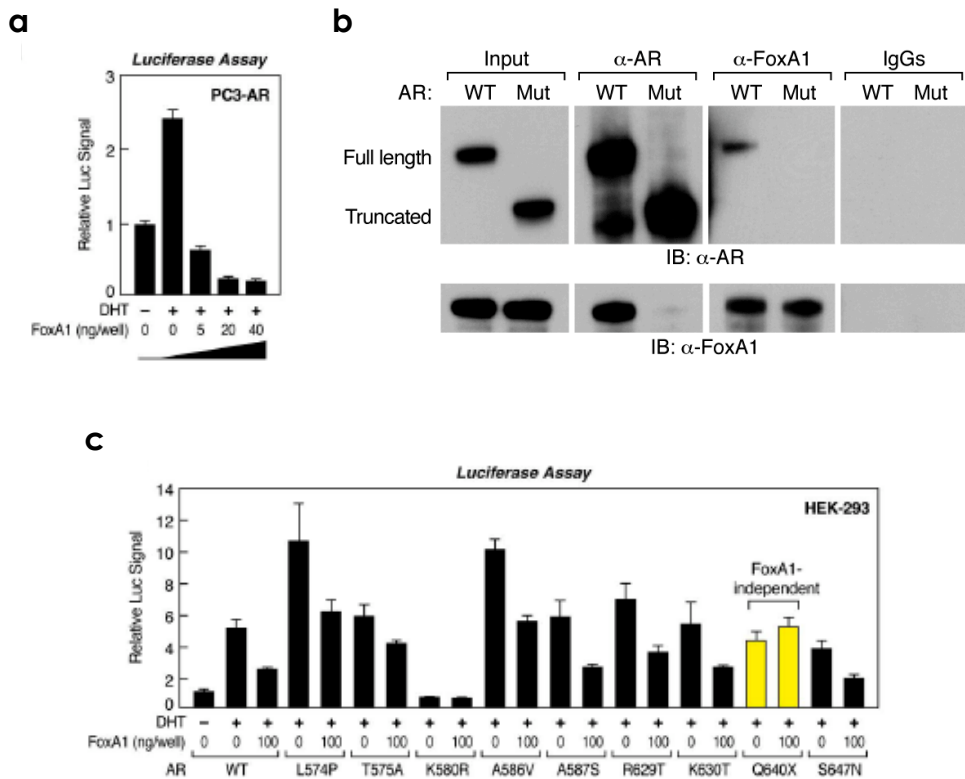

**Supplementary Figure 11. FoxA1 squelches AR-dependent transcription from an ARE-regulated *Luciferase* reporter.** (a) Trans-repression of AR-dependent gene expression by FoxA1 from an ARE-containing reporter in transfected PC3-AR cells. (b) Co-IP analysis of the interaction of FoxA1 with the full length or truncated AR in transfected HEK293 cells. (c) Analysis of an AR mutant panel for potential escape of FoxA1 trans-repression. Nine AR mutants were originally identified in advanced prostate tumors (ref. 41). The trans-repression effect was determined in transfected HEK293 cells in the presence of DHT. Error bars represent standard deviation based on four independent experiments in both a and b.

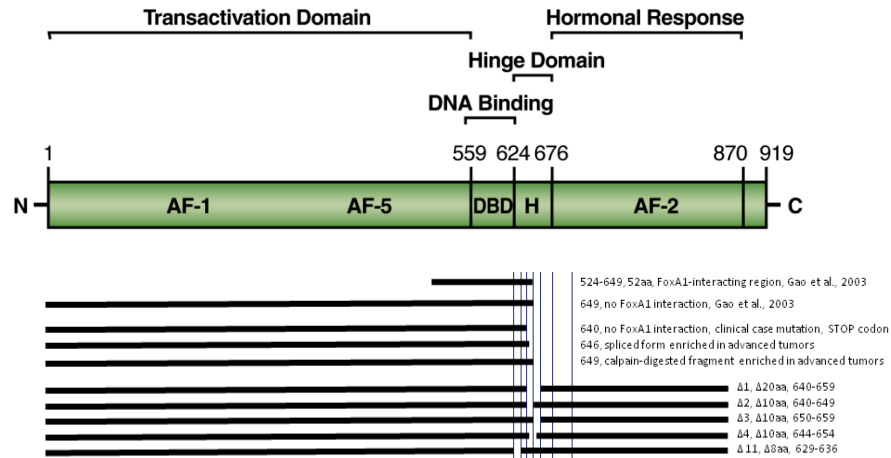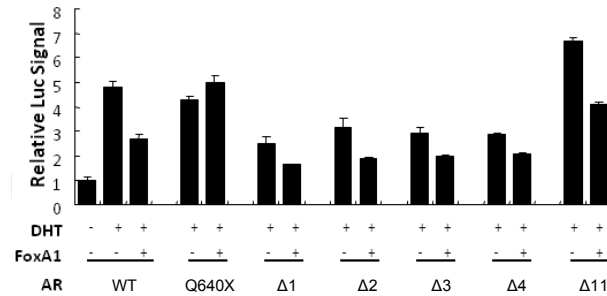

**Supplementary Figure 12. AR LBD is involved in FoxA1:AR protein interactions.** A series of short deletions were generated affecting the residues located between the 3' end of the Q640X mutant and the 3' end of the reported FoxA1 interacting domain (shown on top). AR deletions were tested by the *Luciferase* assay in HEK293 cells (bottom). Error bars represent standard deviation based on four independent experiments.

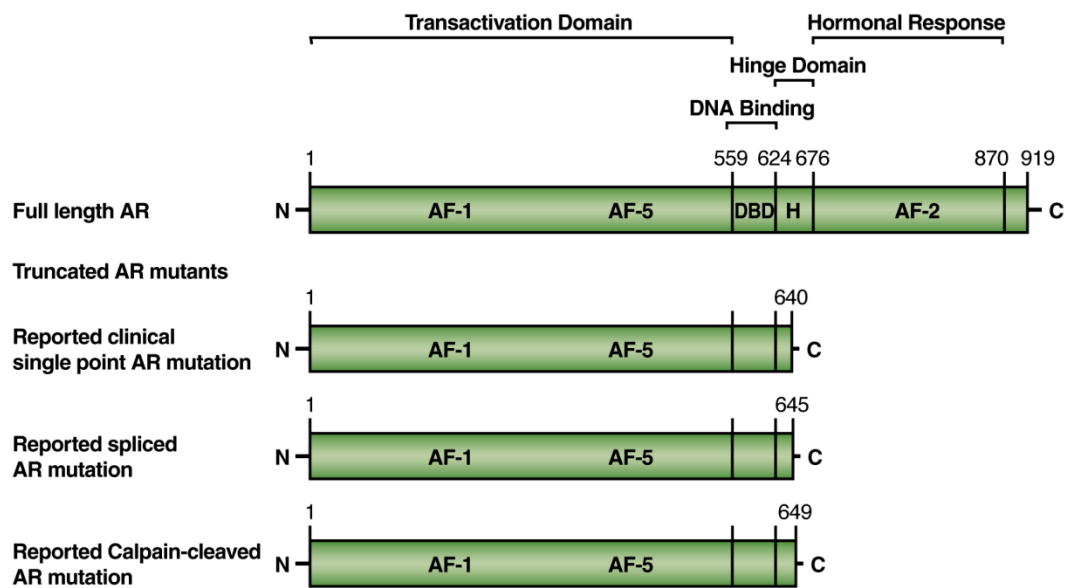

**Supplementary Figure 13. Three alternative strategies to generate truncated AR that lacks the ability to bind to FoxA1.** Multiple AR abnormalities have been reported in advanced prostate tumors, including a point mutation that creates a stop codon after position 640, frame shift resulting from alternative splicing that causes translation termination at position 645, and calpain-mediated cleavage of AR at position 649, all of which occur in the hinge region critical for FoxA1 interaction with AR.

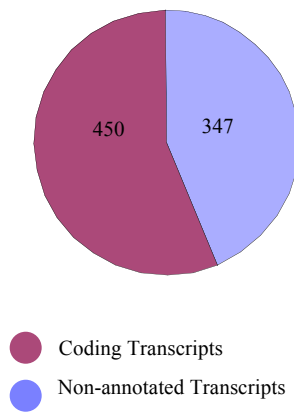

**Supplementary Figure 14. DHT-induced coding and non-annotated transcripts identified by GRO-seq.** In the DHT induced genes, 450 transcripts are from coding genes and 347 transcripts are non-annotated.

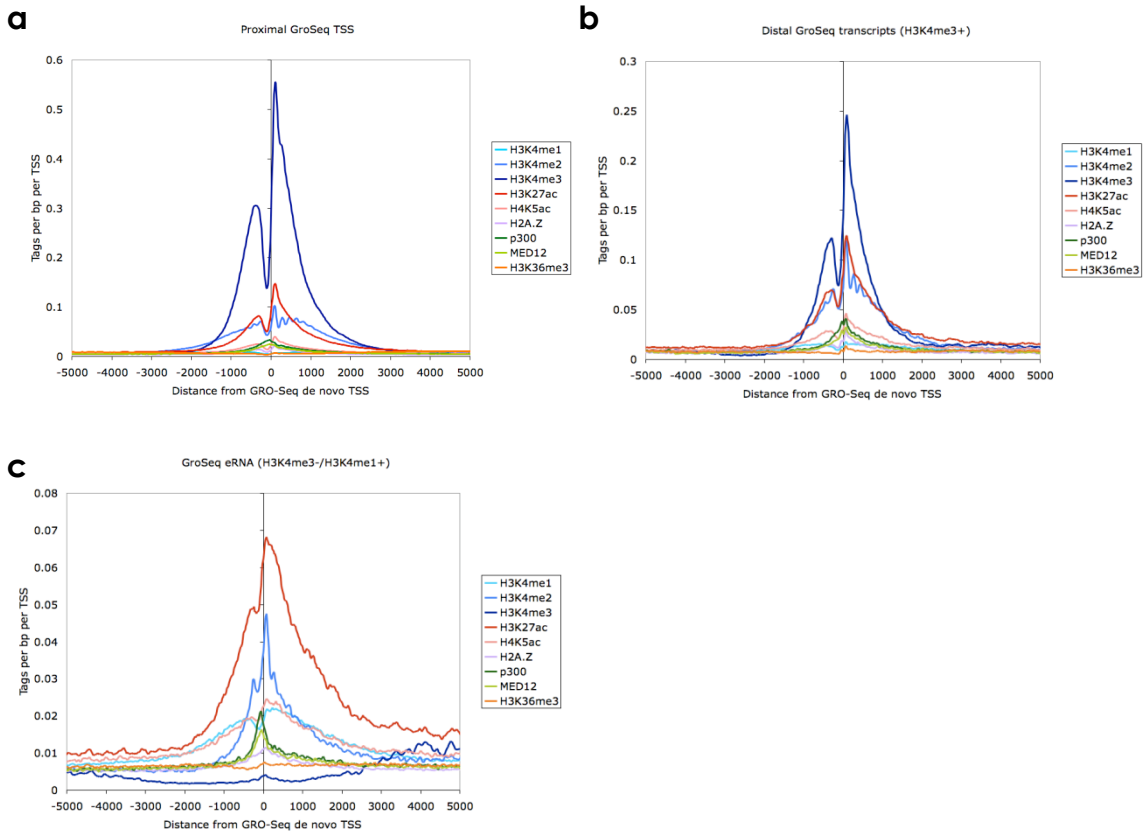

**Supplementary Figure 15. Chromatin modifications and architecture at different genomic loci generating eRNA defined by GRO-Seq.** (a) Normalized CHIP-Seq read density for various histone modifications and co-activators around GRO-seq defined TSSs within 3 kb of RefSeq TSSs (b) Same as (a) for GRO-seq defined TSSs around H3K4me3+ regions located > 3kb from RefSeq TSSs. (c) Same as (a) for GRO-seq defined TSSs around H3K4me1+/H3K4me3- regions localized >3kb fro RefSeq TSSs.

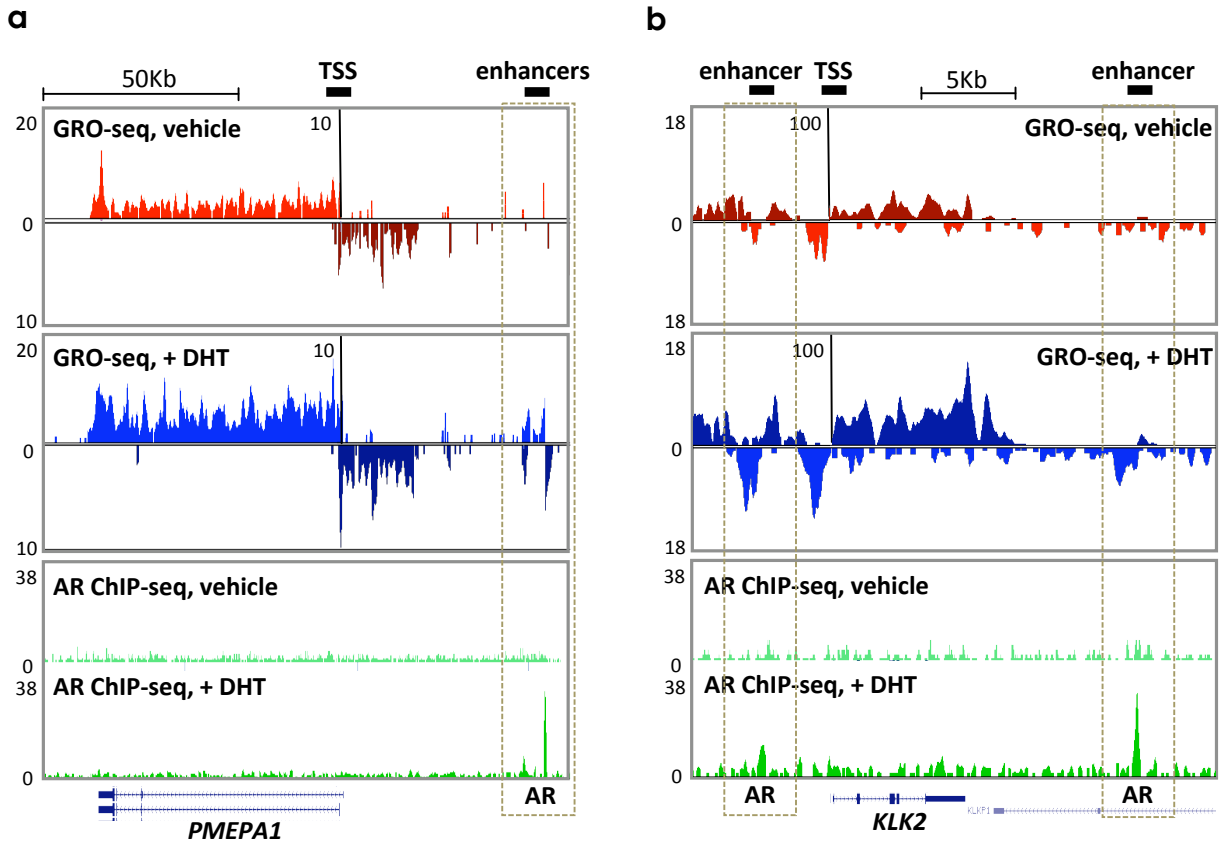

**Supplementary Figure 16. Additional illustrative examples of DHT-induced eRNAs.** (a, b) Nascent RNA on the classical DHT-regulated *PMPA1* (a) and *KLK2* (b) genes. Numbers indicate the scale of normalized read depth. Note different scales for the reads between genic and enhancer regions. The bottom panels show AR binding before and after DHT treatment.



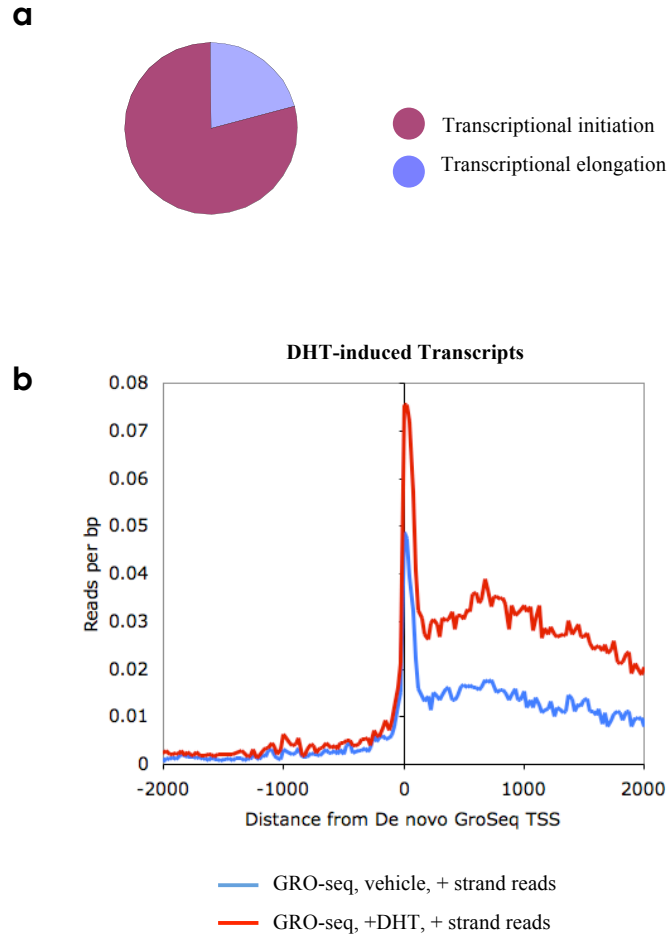

**Supplementary Figure 17. The effect of DHT induction on transcriptional initiation or elongation. (a)** In the DHT-induced transcripts identified by GRO-seq, 21% showed minimal induction of nascent RNA just downstream of promoter regions (-100 to +200 bp, <1.5 fold) and robust induction of nascent RNA in the gene body (+200 bp to +4000 kb, >1.5 fold), indicating that DHT enhanced transcription elongation on these genes. The remaining transcripts (79%) exhibited a general increase in nascent transcripts throughout the transcribed region, indicating that DHT stimulated transcription initiation from these genes. **(b)** Profile of sense GRO-Seq reads before and after treatment with DHT around the TSS of induced transcripts showing increases in both promoter-associated and gene body nascent RNA.

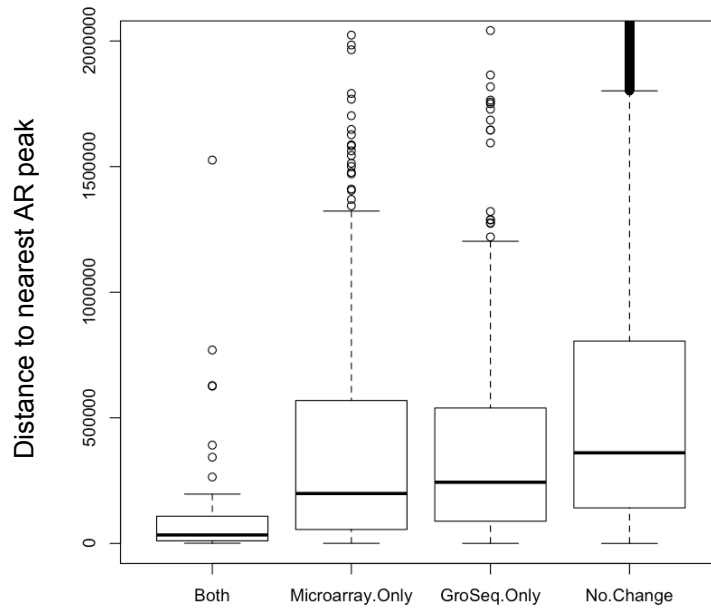

**Supplementary Figure 18. Distance to the nearest AR binding sites from DHT-induced genes defined by GRO-seq and/or gene expression arrays. “Both”** refers to genes (54) are defined as DHT-induced detected by both GRO-seq (DHT 1h) and microarray (DHT 20h); **“Microarray only”** or **“GRO-seq only”** refer to genes only defined by microarray data (472) or GRO-seq data (301); **“No Change”** means genes not regulated by DHT by either platform, and serves as a negative control.

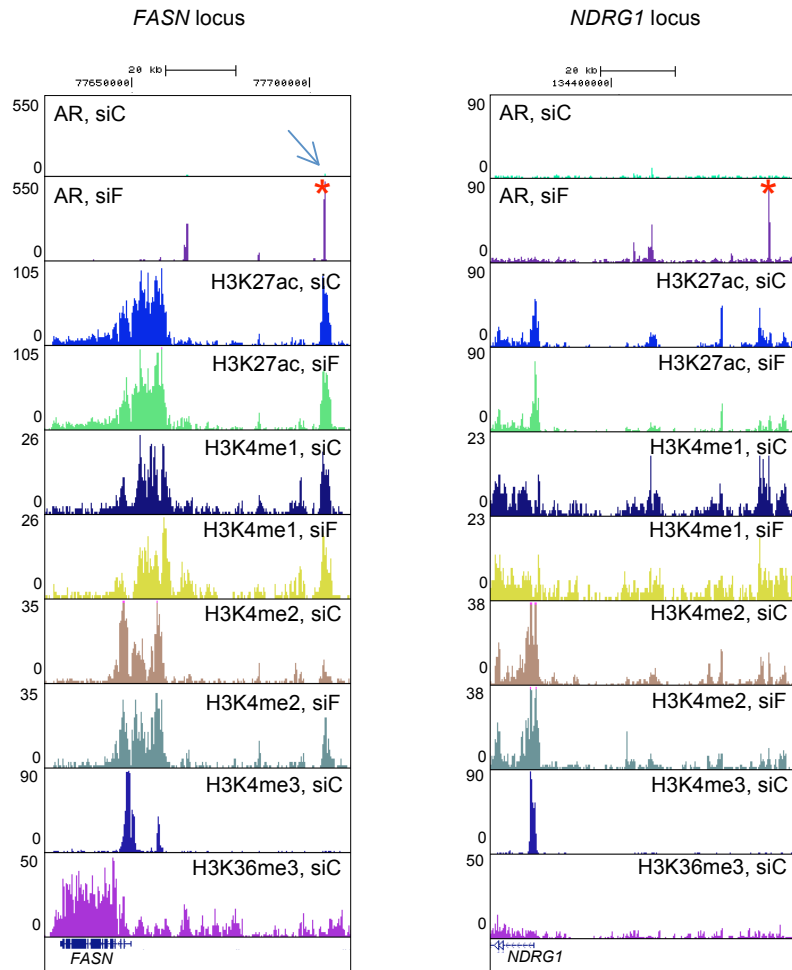

**Supplementary Figure 19. Histone marks, AR ChIP-seq profiles around *FASN* and *NDRG1* genes.** Multiple enhancer marks are pre-established on the distal AR binding sites induced by *FOXA1* knockdown (red asterisks). All experiments shown were performed in the presence of DHT. The arrow indicates a weak AR binding site detectable by ChIP-seq in control siRNA treated cells (the signal is barely visible because of the scale in the figure). This site is largely induced upon *FOXA1* knockdown.

### H3K4me1 on gained AR Binding Sites (the full gained AR program)

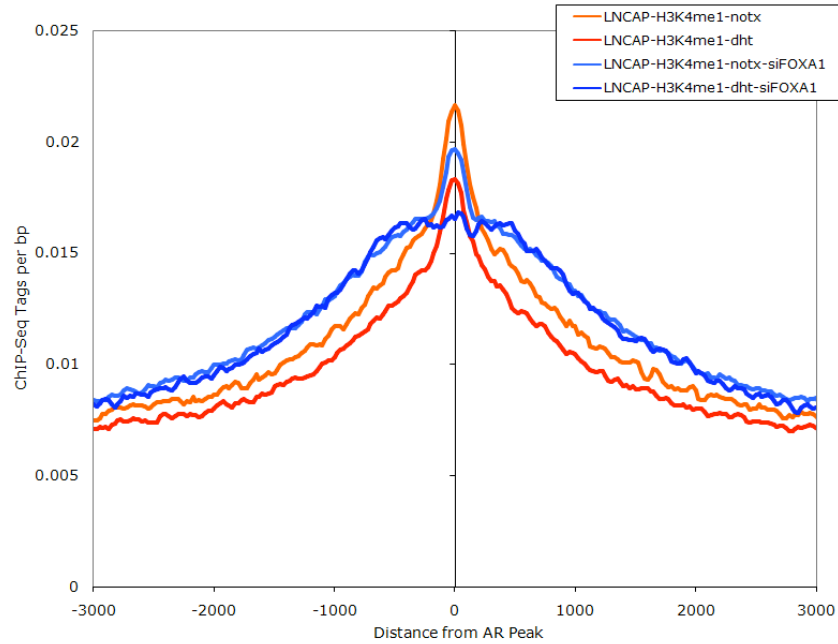

**Supplementary Figure 20. Gained AR loci are largely pre-marked with H3K4me1 before *FOXA1* knockdown in LNCaP cancer cells.** The data show the similar distribution of H3K4me1 surrounding gained AR loci with or without DHT treatment and before and after *FOXA1* knockdown.

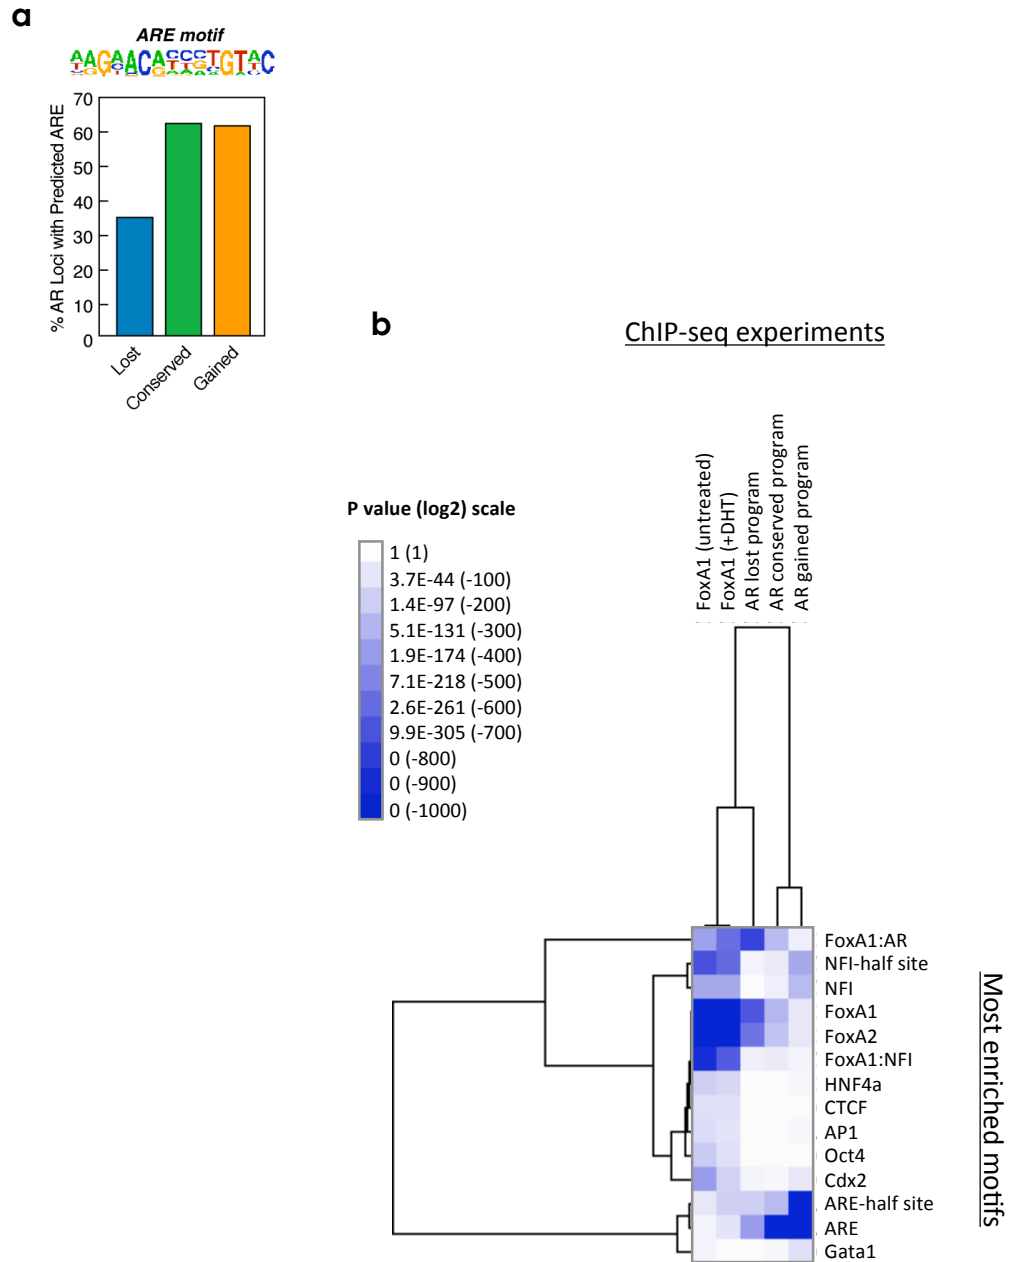

**Supplementary Figure 21. Distinct motif patterns are associated with the different AR binding programs observed in LNCaP cells. a)** Percentage of AREs present in individual AR programs. **(b)** Hierarchical clustering of motif enrichment revealed that the FoxA1 motif was lost while the NFI and ARE motifs were enriched in the gained AR program.

| GO         | Term                                         | Gained Program |             | Conserved Program |             | Lost Program |             |
|------------|----------------------------------------------|----------------|-------------|-------------------|-------------|--------------|-------------|
|            |                                              | Rank           | P-value     | Rank              | P-value     | Rank         | P-value     |
| GO:0008152 | metabolic process                            | 1              | 1.17E-19    | 5                 | 1.20E-09    |              | 0.000479858 |
| GO:0044237 | cellular metabolic process                   | 2              | 1.31E-18    | 7                 | 1.95E-08    | 17           | 7.51E-06    |
| GO:0044249 | cellular biosynthetic process                | 3              | 1.26E-13    | 2                 | 1.49E-11    |              | 0.005226284 |
| GO:0009058 | biosynthetic process                         | 4              | 1.51E-13    | 1                 | 3.62E-12    |              | 0.008386217 |
| GO:0044238 | primary metabolic process                    | 5              | 2.06E-13    | 4                 | 8.24E-10    |              | 0.000234953 |
| GO:0051186 | cofactor metabolic process                   | 6              | 1.29E-11    |                   | 0.137658326 |              | 1           |
| GO:0006732 | coenzyme metabolic process                   | 7              | 1.44E-09    |                   | 0.245480125 |              | 1           |
| GO:0042254 | ribosome biogenesis                          | 8              | 3.55E-09    |                   | 0.029564408 |              | 0.547401117 |
| GO:0055114 | oxidation reduction                          | 9              | 6.19E-09    |                   | 0.002187683 |              | 0.910637914 |
| GO:0051188 | cofactor biosynthetic process                | 10             | 1.41E-08    |                   | 0.371992701 |              | 1           |
| GO:0042180 | cellular ketone metabolic process            | 11             | 1.68E-08    |                   | 0.002878217 |              | 0.452096374 |
| GO:0006082 | organic acid metabolic process               | 12             | 2.14E-08    |                   | 0.000517893 |              | 0.443005441 |
| GO:0006364 | rRNA processing                              | 13             | 3.05E-08    |                   | 0.0752835   |              | 0.451602836 |
| GO:0019752 | carboxylic acid metabolic process            | 14             | 6.95E-08    |                   | 0.002226033 |              | 0.436921778 |
| GO:0043436 | oxoacid metabolic process                    | 15             | 6.95E-08    |                   | 0.002226033 |              | 0.436921778 |
| GO:0016072 | rRNA metabolic process                       | 16             | 8.03E-08    |                   | 0.087225745 |              | 0.466426305 |
| GO:0006091 | generation of precursor metabolites and ener | 17             | 8.99E-08    |                   | 0.583534756 |              | 0.855219129 |
| GO:0034470 | ncRNA processing                             | 18             | 1.22E-07    |                   | 0.03751126  |              | 0.700472205 |
| GO:0034641 | cellular nitrogen compound metabolic process | 19             | 1.91E-07    |                   | 0.002654963 |              | 0.072813465 |
| GO:0034660 | ncRNA metabolic process                      | 20             | 4.26E-07    |                   | 0.050378031 |              | 0.771195271 |
| GO:0006260 | DNA replication                              |                | 0.387204676 | 3                 | 2.64E-11    | 2            | 6.48E-11    |
| GO:0006259 | DNA metabolic process                        |                | 0.802715915 | 6                 | 4.09E-09    | 1            | 1.39E-11    |
| GO:0006261 | DNA-dependent DNA replication                |                | 0.918809139 | 8                 | 2.57E-08    | 4            | 3.06E-08    |
| GO:0006695 | cholesterol biosynthetic process             |                | 0.000505785 | 9                 | 8.78E-08    |              | 1           |
| GO:0006807 | nitrogen compound metabolic process          |                | 3.27E-05    | 10                | 3.01E-07    |              | 0.000300211 |
| GO:0008610 | lipid biosynthetic process                   |                | 2.18E-06    | 11                | 5.69E-07    |              | 0.596207955 |
| GO:0006629 | lipid metabolic process                      |                | 2.88E-06    | 12                | 7.82E-07    |              | 0.739702455 |
| GO:0016126 | sterol biosynthetic process                  |                | 0.000186421 | 13                | 1.05E-06    |              | 1           |
| GO:0006270 | DNA replication initiation                   |                | 1           | 14                | 1.11E-06    |              | 0.000129349 |
| GO:0008203 | cholesterol metabolic process                |                | 0.008465251 | 15                | 1.25E-06    |              | 1           |
| GO:0006066 | alcohol metabolic process                    |                | 0.001261703 | 16                | 1.78E-06    |              | 0.702740101 |
| GO:0044255 | cellular lipid metabolic process             |                | 8.35E-07    | 17                | 1.86E-06    |              | 0.586610454 |
| GO:0034961 | cellular biopolymer biosynthetic process     |                | 0.026455255 | 18                | 2.69E-06    |              | 0.000444515 |
| GO:0016125 | sterol metabolic process                     |                | 0.003337048 | 19                | 3.38E-06    |              | 1           |
| GO:0043284 | biopolymer biosynthetic process              |                | 0.019093857 | 20                | 3.74E-06    |              | 0.000508197 |
| GO:0006268 | DNA unwinding during replication             |                | 1           |                   | 0.286467022 | 3            | 1.58E-08    |
| GO:0006974 | response to DNA damage stimulus              |                | 0.980989015 |                   | 0.01482131  | 5            | 6.48E-08    |
| GO:0032508 | DNA duplex unwinding                         |                | 0.773343826 |                   | 0.356895738 | 6            | 7.44E-08    |
| GO:0032392 | DNA geometric change                         |                | 0.773343826 |                   | 0.356895738 | 7            | 7.44E-08    |
| GO:0044260 | cellular macromolecule metabolic process     |                | 0.000147801 |                   | 0.002143552 | 8            | 9.93E-08    |
| GO:0034984 | cellular response to DNA damage stimulus     |                | 0.978101301 |                   | 0.027651409 | 9            | 1.46E-07    |
| GO:0007049 | cell cycle                                   |                | 0.12380565  |                   | 0.001979187 | 10           | 1.62E-07    |
| GO:0006281 | DNA repair                                   |                | 0.97762555  |                   | 0.018183397 | 11           | 1.98E-07    |
| GO:0034960 | cellular biopolymer metabolic process        |                | 0.000255471 |                   | 0.002650436 | 12           | 3.02E-07    |
| GO:0033554 | cellular response to stress                  |                | 0.825348385 |                   | 0.044674289 | 13           | 2.06E-06    |
| GO:0043170 | macromolecule metabolic process              |                | 0.001871065 |                   | 0.011697168 | 14           | 5.91E-06    |
| GO:0022403 | cell cycle phase                             |                | 0.02086814  |                   | 0.006194834 | 15           | 6.21E-06    |
| GO:0043283 | biopolymer metabolic process                 |                | 0.003156408 |                   | 0.011797958 | 16           | 6.77E-06    |
| GO:0051716 | cellular response to stimulus                |                | 0.764453906 |                   | 0.110368828 | 18           | 1.49E-05    |
| GO:0006284 | base-excision repair                         |                | 0.60753604  |                   | 0.463875052 | 19           | 1.89E-05    |
| GO:0000279 | M phase                                      |                | 0.034196138 |                   | 0.00394514  | 20           | 3.01E-05    |

**Supplementary Figure 22. Gene Ontology (GO) analysis of the lost, conserved, and gained DHT-responsive gene programs in response to FOXA1 knockdown.** Comparison of the top 20 enriched teams revealed preferential association of the lost program with terms in DNA replication/repair; the conserved program with lipid metabolism and DNA replication, and the gained program with macromolecular biosynthesis and general metabolic processes (cell growth).

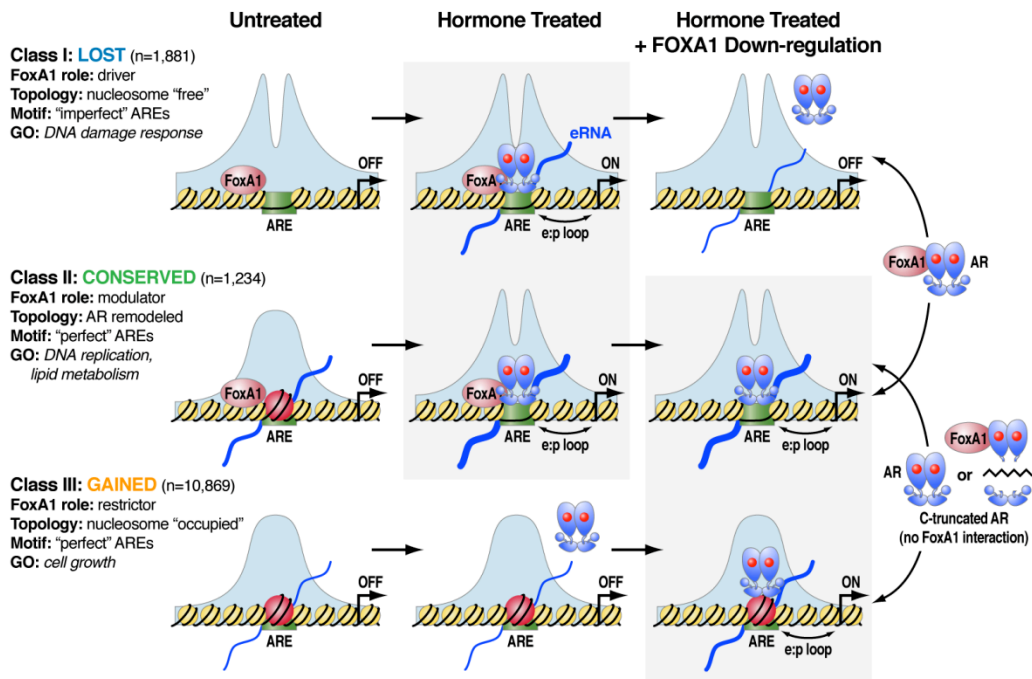

**Supplementary Figure 23. Proposed model for FoxA1-mediated AR targeting and reprogramming in LNCaP cells.** The model diagrams three classes of AR-bound enhancers and DHT-induced eRNA expression from them. In Class I (lost AR program), FoxA1 pre-occupancy may license AR to bind to those sites upon DHT treatment and to induce eRNAs, a process potentially assisted by direct AR:FoxA1 interactions in addition to their independent DNA binding activities. This lost program in FOXA1 down-regulated cells may enhance genome instability according to GO analysis. In Class II (conserved AR program), AR binds to those sites independent of FoxA1, perhaps due to the presence of canonical AREs, which helps preserve cell proliferation functions. The levels of AR, p300, and Med12 binding as well as eRNA generation are modulated by, but not dependent on, FoxA1. In Class III (gained AR program), FoxA1 normally restricts AR binding and prevents DHT-induced eRNA production, despite the presence of strong AREs. Although pre-established, these gained loci exhibit very unique chromatin organizational features, including a strong central nucleosome, heavily marked by modified histones and the histone variant H2A.Z, none of which is dismissed upon AR binding. AR released from trans-repression by FoxA1 licenses conversion of those sites to androgen-responsive, eRNA-generating enhancers to activate a new androgen-regulated gene expression program, which further facilitates cell proliferation. The FoxA1-mediated AR reprogramming may underlie prostate cancer progression to acquire more aggressive tumor phenotype. The general principle on enhancer switches regulated by cell lineage-specific, signal-induced transcription factors may apply to many other developmental and disease processes.

| Primer name  | Primer sequence       |
|--------------|-----------------------|
| ARGained1-5  | CAGTCTCTGGGACCTCACCT  |
| ARGained1-3  | GACAGTGGCAGGTAGGGAAC  |
| ARGained2-5  | TGGAGTGCATATCAGTGCAG  |
| ARGained2-3  | ACGGCCAATTACTTGTTTGC  |
| ARGained3-5  | TTATCTGATGGCCTCGATCC  |
| ARGained3-3  | GCACAGGGTGACTTTGTCTC  |
| ARGained4-5  | GACTTCTTGTGGTGGCTTC   |
| ARGained4-3  | GGTTTGCCTTTGTTTCATGG  |
| ARGained5-5  | AGGAGTTCTCCAGGCAAAAC  |
| ARGained5-3  | ACCCAGCCTAACCCACAGTGA |
| ARGained6-5  | TGCAGCCTGATCTTCCTCTT  |
| ARGained6-3  | TGCTTTGGTCAACAGACTGC  |
| ARGained7-5  | TTCCGCTGGTCCAGTATTTTC |
| ARGained7-3  | CTGTGTTTCCAAGCTGACA   |
| ARGained8-5  | AGGGCAGCCTCTGAAATCTT  |
| ARGained8-3  | GATGCTGCTCATTCAGGTCA  |
| ARGained9-5  | ATGGGTCCTGTTTGTTCCTA  |
| ARGained9-3  | CGCCAGGCTGATTAAGAAG   |
| ARGained10-5 | ACAAACATTGCCCATGAGT   |
| ARGained10-3 | CTGCCACTGAAGGAGACACA  |
| ARGained11-5 | CCTGGACCTGTCTTTGTGT   |
| ARGained11-3 | CAGAGAGCAGCAATGCAG    |
| ARGained12-5 | CATCTCCACACCTCACCTT   |
| ARGained12-3 | GAGGGAGCAAAACAGTGTCC  |
| ARGained13-5 | GATGACCTCGGCTAATCCA   |
| ARGained13-3 | ATCCTGTTCCAGGAGCAATG  |
| ARGained14-5 | AGCGTGCTCCTGCCTATTTA  |
| ARGained14-3 | CGTAAAGGCAAGGGTGTGAT  |
| ARGained15-5 | AAGGACGCTTTTCTGTCCCA  |
| ARGained15-3 | TGTGTGCTATGCCAATGTT   |
| ARGained16-5 | TGTCGGTCGCTGAGTTACAG  |
| ARGained16-3 | GGACATGACAGGCAGGATCT  |
| ARLost1-5    | TGGCAGTTACCGAAAGTGTG  |
| ARLost1-3    | TCCAGGTTTTGGGCTATCAC  |
| ARLost2-5    | AAATCTGGCTACACGGATGG  |
| ARLost2-3    | GGCATGAGAGAACTTTTGCA  |
| ARLost3-5    | GCCACTGTACCTTGGAGAGG  |
| ARLost3-3    | AGGAAGGCCATCTGGATTTT  |
| ARLost4-5    | TATTGCATTGTCGGGACTTG  |
| ARLost4-3    | TAGGGAAGAAAGCTGGCAAC  |
| ARLost5-5    | CAGGCAATAGGAAATGTCTGC |
| ARLost5-3    | GTCCCTGAGAACAACCAGGA  |
| ARLost6-5    | GCAGGCTGATGCTTCTGTAA  |
| ARLost6-3    | AGGCTTTGCTGCCATAAGAA  |
| ARLost7-5    | ACCATCATAAGTCTCGGCTTG |
| ARLost7-3    | TCAGTAGGCACTCCCAATCA  |
| ARLost8-5    | TGCAAGGTGATGGAAATCCA  |
| ARLost8-3    | AGGGTGTGAGGGTGTGAGTC  |
| ARLost9-5    | TTCTTCCCTGACCATTTTGG  |
| ARLost9-3    | TCAAGGAATGCTCACTGTGG  |
| ARLost10-5   | TCACGTTAAAGGCATGGTTTG |
| ARLost10-3   | CTTTGGTTCTGTCCCTCTGG  |
| ARLost11-5   | GTGTTTGGGCAGAAAAAGGA  |
| ARLost11-3   | CATGCAGCGTACTCACAACA  |
| ARLost12-5   | ACAATGCCAAGTGTGGTGA   |
| ARLost12-3   | TGGTGGGTGGATTATACCTCA |
| ARLost13-5   | CGTCCCAAGTCACTTTGTTT  |
| ARLost13-3   | GTCAAATGCCTTGAGAGGA   |
| ARLost14-5   | GTGAGAGACGGGGAACAAA   |
| ARLost14-3   | TTGAGGCTCTGGGGTTAATG  |
| ARLost15-5   | TGTGTAATGGACGGGCAGT   |
| ARLost15-3   | TTTTACTGCTCCAGGCTGCT  |
| ARLost16-5   | TGTGGTTGAGCTTTGGAAAA  |
| ARLost16-3   | CCCTAGGAATGGAATGCTG   |
| ARLost17-5   | AAGCAGACACCCAGAGCCTA  |

| Primer name     | Primer sequence        |
|-----------------|------------------------|
| ARLost17-3      | TGGTCTCACTTGGTTGACTCC  |
| ARLost18-5      | GCCCAGGAGGGAGACTTTAT   |
| ARLost18-3      | TTGCATAGCAAACCTGCCTTG  |
| ARLost19-5      | AACAGCCCCCTTCAAGACTG   |
| ARLost19-3      | CATCATCAACAGGAGGGACA   |
| ARLost20-5      | GCTTGGCCTGATCATTCACT   |
| ARLost20-3      | TGTCATTTCCGAACCCCTCTC  |
| ARLost21-5      | TGGGAGGACAAGAACCAATGA  |
| ARLost21-3      | TCCCTGAGCCCTTTCTCTAA   |
| ARLost22-5      | CACAGAGGGTCTAGGCATGG   |
| ARLost22-3      | GGATCTTTGGCAAGAAGTGTG  |
| ARConserved1-5  | TTCCGAAGTGCTGGGATTAC   |
| ARConserved1-3  | TACCCATGCAAAACACATGCT  |
| ARConserved2-5  | TGCCATGTCTGTTGGGTAA    |
| ARConserved2-3  | AGAATCTGAAAAATGGAAGGAA |
| ARConserved3-5  | ACTGGCCCATTTGTTCTGC    |
| ARConserved3-3  | TGGGAACAACACCAAACTCA   |
| ARConserved4-5  | TCGGCACATTATTGCAATTTG  |
| ARConserved4-3  | TGCCACATGGTTTCTTTGA    |
| ARConserved5-5  | ACTGTTCCAGCAGCACACAC   |
| ARConserved5-3  | ATTGTTGGTCACTGCTTCC    |
| ARConserved6-5  | CAGCTGGAAAAACCACTCTC   |
| ARConserved6-3  | AGGAGAGCAGCTTCCGTAAA   |
| ARConserved7-5  | TGGCAAAACAAGCCACATAA   |
| ARConserved7-3  | TGTAGCACCAGTCCCTTTT    |
| ARConserved8-5  | GCACCAGGAAACAGACAAAAT  |
| ARConserved8-3  | AGCCTAATGACCTCCCTGT    |
| ARConserved9-5  | CTGAGGGGAAGTTGAGTGC    |
| ARConserved9-3  | CCCAGGAAGAACAACCTCA    |
| ARConserved10-5 | AACTCTCAACGCTGCCAATC   |
| ARConserved10-3 | GCAGTTTATGGCTCCACAT    |
| ARConserved11-5 | GGAAACAGCAGGAGGAAAAACA |
| ARConserved11-3 | TATACCAGGCTTCCCAAAG    |
| ARConserved12-5 | ACTTAAAGGGGGAGGGAGGT   |
| ARConserved12-3 | CAGCTCGCTTGATGTGGTTA   |
| ARConserved13-5 | TTGGCAACAGAGTGAGCATC   |
| ARConserved13-3 | TTGCACAATTTCCCTTCTC    |
| ARConserved14-5 | CTACTTCTCCCTGCCACTC    |
| ARConserved14-3 | TCTCTCCCTTCGATGTGTC    |
| ARConserved15-5 | TTTTTGGGTCAAGGAAGTGG   |
| ARConserved15-3 | GCATCTGCAAGGATCATAA    |
| ARConserved16-5 | GCAGATGAGCAGAAGGGAAG   |
| ARConserved16-3 | TCAGCAGGCAACACAAAAC    |
| ARConserved17-5 | TTCCGAAGTGCTGGGATTAC   |
| ARConserved17-3 | GGTTGGAACAAGGGTTCTCT   |
| ARConserved18-5 | CTCGCCAGTGCTTGTAACT    |
| ARConserved18-3 | CACATGGCAGATGCTCAGTT   |
| ARConserved19-5 | AGGGCAACAAGAAACAATGG   |
| ARConserved19-3 | AACCTCGACTCTGCTCTGGA   |
| ARConserved20-5 | TGGTCAACAAGCTGGGAAT    |
| ARConserved20-3 | GGCTTTCAGCTGATGTCCTC   |
| ARConserved21-5 | AGTTCTGCCAGGTGTTCCAC   |
| ARConserved21-3 | GGGGGAAAGAGTTGAGAAGC   |
| ARConserved22-5 | GACAAAGGAGGAAGCAGCAG   |
| ARConserved22-3 | CACTTGCCTGGGAAATATGG   |
| ARConserved23-5 | GCTTCAGGTCAAGGTGGTGT   |
| ARConserved23-3 | AAACGGGGCAGTAGTTGATG   |
| ARConserved24-5 | CCATGGGTAGCCAGTCACT    |
| ARConserved24-3 | AATGCAAAACCATCTCATTGC  |
| ARConserved25-5 | CTGGGGCATTATTTTCAA     |
| ARConserved25-3 | ATGCATACAGGGCTTCGTT    |
| ARConserved26-5 | CACTGAATGGGTGTCACCTG   |
| ARConserved26-3 | TTTGAACACACCTGGGAACA   |
| ARConserved27-5 | TCTGGCACAGTTGACTTGC    |
| ARConserved27-3 | AGTGGAGGCTTAAAGGGAGGA  |

Supplementary Figure 24 Primers used for ChIP-qPCR analysis in this study.



| Antibody | Cell Type | siRNA   | Treatment | Total Mapped Tags (hg18) | Peaks/Regions | Peak Finding Parameters [default: peak size = 200 bp, FDR<0.001, >4x over input signal, >4x over local signal] |
|----------|-----------|---------|-----------|--------------------------|---------------|----------------------------------------------------------------------------------------------------------------|
| AR       | LNCaP     | siCTL   | +dht      | 12,369,597               | 3,115         |                                                                                                                |
| AR       | LNCaP     | siFOXAI | +dht      | 7,752,382                | 12,103        |                                                                                                                |
| AR       | LNCaP     | siCTL   | +vehicle  | 12,340,126               | 205           |                                                                                                                |
| FoxA1    | LNCaP     | siCTL   | +vehicle  | 7,853,276                | 48,129        |                                                                                                                |
| FoxA1    | LNCaP     | siCTL   | +dht      | 7,879,378                | 33,426        |                                                                                                                |
| H3K4me1  | LNCaP     | siCTL   | +vehicle  | 7,660,303                | 45,931        | Peak size 2000 bp, >3x input, >1x local                                                                        |
| H3K4me1  | LNCaP     | siCTL   | +dht      | 11,347,500               | 51,544        | Peak size 2000 bp, >3x input, >1x local                                                                        |
| H3K4me1  | LNCaP     | siFOXAI | +vehicle  | 13,993,617               | 61,405        | Peak size 2000 bp, >3x input, >1x local                                                                        |
| H3K4me1  | LNCaP     | siFOXAI | +dht      | 8,711,004                | 47,586        | Peak size 2000 bp, >3x input, >1x local                                                                        |
| H3k4me2  | LNCaP     | siCTL   | +vehicle  | 9,422,758                | 49,826        | Peak size 1000bp, Mnase                                                                                        |
| H3k4me2  | LNCaP     | siCTL   | +dht      | 10,186,956               | 49,308        | Peak size 1000bp, Mnase                                                                                        |
| H3k4me2  | LNCaP     | siFOXAI | +vehicle  | 9,116,636                | 44,828        | Peak size 1000bp, Mnase                                                                                        |
| H3k4me2  | LNCaP     | siFOXAI | +dht      | 7,975,165                | 42,264        | Peak size 1000bp, Mnase                                                                                        |
| H3K4me3  | LNCaP     | siCTL   | +dht      | 15,188,174               | 14,283        | Peak size 1000bp                                                                                               |
| H3K27ac  | LNCaP     | siCTL   | +dht      | 10,228,155               | 48,385        | Peak size 1000bp                                                                                               |
| H3K27ac  | LNCaP     | siFOXAI | +dht      | 9,864,179                | 45,770        | Peak size 1000bp                                                                                               |
| H4K5ac   | LNCaP     | siCTL   | +dht      | 9,273,559                | 54,426        | Peak size 2000bp, >3x input, >1x local                                                                         |
| H4K5ac   | LNCaP     | siFOXAI | +dht      | 7,247,434                | 42,384        | Peak size 2000bp, >3x input, >1x local                                                                         |
| H3K36me3 | LNCaP     | siCTL   | +dht      | 9,810,690                | 52508         |                                                                                                                |
| H2AZ     | LNCaP     | siCTL   | +dht      | 11,711,146               | 16392         | Peak size 2000bp, >3x input, >1x local                                                                         |
| H2AZ     | LNCaP     | siFOXAI | +dht      | 9,355,679                | 7841          | Peak size 2000bp, >3x input, >1x local                                                                         |
| p300     | LNCaP     | siCTL   | +dht      | 4,161,562                | 4295          |                                                                                                                |
| p300     | LNCaP     | siFOXAI | +dht      | 3,871,540                | 5730          |                                                                                                                |
| MED12    | LNCaP     | siCTL   | +dht      | 5,260,539                | 3365          |                                                                                                                |
| MED12    | LNCaP     | siFOXAI | +dht      | 5,332,366                | 5618          |                                                                                                                |
| GRO-seq  | LNCaP     | siCTL   | +vehicle  | 10,084,264               | -             |                                                                                                                |
| GRO-seq  | LNCaP     | siCTL   | +dht      | 11,943,507               | -             |                                                                                                                |
| GRO-seq  | LNCaP     | siFOXAI | +dht      | 10,611,010               | -             |                                                                                                                |
| Input    | LNCaP     | -       | -         | 44,140,163               | -             |                                                                                                                |

**Supplementary Figure 25. Summary of ChIP-seq experiments performed in this study.** ChIP-seq analysis in DHT and mock treated (1hr or 4hrs for MNases-treated experiments) combined with *CTL* or *FOXAI* siRNA treatment in LNCaP cells. Peak analysis was performed as described in Supplementary information.
